# Supplementary material for: JTC801 regresses uveal melanoma progression through novel methuosis-like cell death via lysosomal dysfunction
Source: Research Square preprint supplement (doi:10.21203/rs.3.rs-5718647/v1), 2025-02-04
Supplement: Supplementary file 1 [file 139f943d811322d9f1d5dc11.docx]

**Supporting Information**

**JTC801 regresses uveal melanoma progression through novel methuosis-like cell death via lysosomal dysfunction**

Mingyan Huang1,#, Xinpei Ji2,# Ha Zhu1,#, Wenjun Chang3, Hao Shen3, Yizhi Yu1,* and Qiuyan Liu1,*

1. **Supplementary Video Legend**

Video 1. The vacuoles accumulated after JTC801 treatment. Images of MUM2B cells were captured every 2 hours over a 48-hour period after treated with JTC801 (3 µM) using the IncuCyte real-time imaging system.

1. **Supplementary Figure Legend**

**Supplementary Figure 1. JTC801 suppresses UM cells growth *in vitro***

(A) Cell viability of UM cells following treatment with the selected kinase inhibitors from kinase inhibitor library (ZK012) at indicated concentration for 24 h detected by CCK8 assay.

(B-C) Cell viability of B16F10 cells following treatment with JTC801 for 24 h at indicated concentration (B) or at indicated time with 3 μM JTC801 treatment (C) detected by CCK8 assay.

(D) MUM2B cells or OMM2.5 cells treated with or without JTC801 (3 μM) for 24h. Cell proliferation was measured by EdU incorporation and analyzed by flow cytometry.

(E) MUM2B cells or OMM2.5 cells treated with or without JTC801 (3 μM) for 8h. Cell cycle was measured by PI staining and analyzed by flow cytometry. Fig Ratio

(F-G) The migrative ability (F) and invasive ability (G) of MUM2B cells, with or without JTC801 (3 μM) treatment for 6 h or 12 h, were evaluated by *in vitro* transwell assay or matrigel-coated transwell assay respectively (left). Statistical analysis was shown in right. Bar = 50 μm.

Data are presented as the mean ± SD from three independent experiments. The *P* values were calculated by unpaired two-tailed Student’s t test (B and D-G) or one-way ANOVA (C). ***P* < 0.01; ****P* < 0.001.

**Supplementary Figure 2. Apoptosis partially involves in JTC801-induced cell death in UM cells**

(A) GSEA enrichment analysis of cell death pathways including apoptosis (left), ferroptosis (middle) and mitophagy (right).

(B) Western blotting analysis of cleaved-Caspase3, BCL-XL, GPX4, LC3B protein expression in MUM2B cells following JTC801 (3 μM) treatment at indicated time. GAPDH served as an internal reference.

(C) Comet assay image of MUM2B cells in the absence (n=122) or presence (n=64) of JTC801(3 μM) for 48h (left). Length of comet tail was measured (right). Bar = 20 μm.

(D) Representative images of γ-H2AX signal in MUM2B cells obtained by CLSM after treatment with or without JTC801 (3 μM) for 16 h. Nucleus were stained with DAPI. Bar = 5 μm.

(E) MUM2B cells were treated with JTC801 (3 µM) in the absence or presence of Z-DEVD-FMK (25 µM), Z-VAD-FMK (25 µM), necrostatin-1 (50 µM), ferrostatin-1 (2 µM) for 24 hours. Cell viability was detected by CCK8 assay.

(F-G) Cell viability in MUM2B cells treated with JTC801 (3 µM) in the absence or presence of Mdivi-1 (F) or 3MA (G) for 24 h was detected by CCK8 assay.

Data are presented as the mean ± SD from three independent experiments. The *P* values were calculated by one-way ANOVA test. ****P* < 0.001; n.s. no significance.

**Supplementary Figure 3. JTC801 impairs** **nutrition transporters expression and energy metabolism**

(A) MUM2B cells were treated with or without JTC801 (3 μM) for 12 h. The mRNA expression of SLC2A3, SLC1A5, CPT2 and FANS were determined by RT-qPCR.

(B-C) GSEA enrichment analysis of tricarboxylic acid cycle (TCA) (B) and oxidative phosphorylation (C).

Data are presented as the mean ± SD from three independent experiments. The *P* values were calculated by unpaired two-tailed Student’s t test. n.s. = no significance.

**Supplementary Figure 4. JTC801 facilitates lysosomal over-acidification and LMP in UM cells.**

(A) KEGG pathway enrichment bubble map of differentially expressed genes in JTC801-treated MUM2B cells. Dotted line indicates q-value (corrected *P* value) = 0.05.

(B) Representative images of MUM2B cells stained with PHrodo after treatment with or without JTC801 (3 μM) for 16 h (left). Bar = 20μm. Semi-quantitative analysis of the average fluorescence intensity of green was performed using ImageJ (right). Data are presented as the mean ± SD from three independent experiments. The *P* values were calculated by unpaired two-tailed Student’s t test. ****P* < 0.001.

(C) Representative immunofluorescence images of MUM2B cells stained with AO after treatment with or without JTC801(3μM) for 16 h, bar = 50 µm.

**Supplementary Figure 5. No obvious side effects are observed in JTC801-treated mice models**

(A) Cytoplasmic vacuoles were detected in JTC801-treated tumor tissues by HE stains. Representative images were shown, and black arrowheads indicate vacuoles. Bar = 50 μm.

(B) Schematic framework of mice model with oral administration.

(C) Nude mice were injected subcutaneously with MUM2B cells and then oral treatment with JTC801 (10mg/kg) for 2 weeks as shown in (B). Tumor volumes were calculated at indicated time (n=5 for each group).

(D) C57BL/6 mice were injected subcutaneously with B16F10 cells, and then oral treatment with JTC801 (20 mg/kg) for 2 weeks as shown in (B). Survival curve of MUM2B tumor-bearing mice was recorded in two groups with or without JTC801 (20 mg/kg) treatment (n=7 for each group).

(E) C57BL/6 and BALB/c mice were given peritoneal administration of JTC801 (10 mg/kg) every two days for 3 weeks. Hearts, livers, spleens, lungs, kidneys and stomachs were harvested and examined by HE stains. Bar = 500 μm.

Data are shown as mean ± SEM, The *P* values were calculated by two-way ANOVA test (C) or log-rank test (D) ; **P* < 0.05; ***P* < 0.01; ****P* < 0.001.

**3. Supplementary Materials and Methods**

**3.1. Cell proliferation**

Cells proliferation was determined via EdU assay according to the manufacturer’s instructions (C10310-2, RiboBio, China). Cells (3 × 105) were seeded into 6-well plates and treated with JTC801 for 24 h, then incubation with EdU (50 μM) medium for an additional 2 h. The cells were then harvested and fixed with 4% paraformaldehyde and incubated with 0.5% Triton-X-100 in PBS for 20 min. Next, 100 μL of Apollo staining solution was added and incubated for 30 min at room temperature in the dark, and then wash with 0.5% TritonX-100 for three times. Finally, adding 500 μl PBS re-suspended cells and a FACSCalibur Flow Cytometer (BDLSRII, San Jose, CA, USA) was used to detect the EdU positive cells.

**3.2. Cell cycle detection**

MUM2B cells and OMM2.5 cells were treated with or without JTC801 for 8 h. Cells were harvested and then fixed in ice-cold 70% ethyl alcohol overnight at 4 °C. Then, the cells were centrifuged at 3000 rpm for 5 min and re-suspended in PBS containing RNase A (20 μg/ml) at 37 °C for 30 min followed by propidium iodide (PI, 25 μg/ml) staining for 30 min. The percentage of cells at each stage of the cell cycle was detected by flow cytometry (BD LSRFortessa, San Jose, CA, USA).

**3.3. *In vitro* migration and** **invasion assay**

The transwell chambers with (354480, Corning) or without (3422, Costar) Matrigel were used to evaluate the ability of cells invasion and migration, respectively. Briefly, 1 × 105 MUM2B cells in 300 μl RPMI serum-free 1640 medium were added to the upper chamber and 15% serum was added to the lower chamber as a chemoattractant. After 6 h for migration or 12 h for invasion at presence or absence of JTC801, penetrated cells on the filters were fixed with paraformaldehyde, and then stained with 0.1% crystal violet. Images photographed and counted under a microscope (OLYMPUS, Tokyo, Japan).

**3.4. Comet assay**

The neutral comet assay was performed using the comet assay kit (4250-050-K, Trevigen) following manufacturer’s instructions. Briefly, MUM2B cells treated with or without JTC801 (3 μM) were harvested in ice cold PBS. Cell suspension was mixed with low-melting agarose (v/v 1:10) and transferred to pre-heated slides. Cells were lysed in neutral lysis solution overnight at 4°C and washed with electrophoresis buffer for 3 times. The samples were then subjected to electrophoresis at 4°C for 35 minutes at a voltage of 16 V. After washing by double-distilled water (ddH2O), the nuclei were stained with SYBR Gold (S11494, Invitrogen) at room temperature for 30 minutes. The samples were then washed with ddH2O and dried at 37°C. Images were captured using a fluorescence microscope (OLYMPUS, Tokyo, Japan).

**3.5. Hematoxylin and eosin (HE)**

Mouse hearts, livers, spleens, lungs, kidneys, stomachs and tumor tissues were fixed in 4% paraformaldehyde and embedded in paraffin. Subsequently, the paraffin-embedded sections were dewaxed, rehydrated and stained with hematoxylin and eosin dye according to the manufacturers’ protocols. Digital imaging was performed using LAS V4.5 (Leica DM 2000, Leica, Wetzlar, Germany).
