# Supplementary material for: JTC801 regresses uveal melanoma progression through novel methuosis-like cell death via lysosomal dysfunction
Source: Research Square preprint supplement (doi:10.21203/rs.3.rs-5718647/v1), 2025-02-04
Supplement: Supplementary file 2 [file 173ebf532e49906d59573ca2.xlsx]

## Sheet: Sheet1
Fig6. B
	PBS						JTC801 20mg/kg						JTC801 5mg/kg
day 0	86	43.75	43.75	90	63		63	50	63	86	72		43.75	43.75	31.25	50	110.5	63
day 2	37.5	37.5	24	108	37.5		63	243	63	122.5	110.25		56.25	81	56.25	147	202.5	110.25
day 4	24	50	43.75	192	24		192	98	182.25	110.25	117		375	134.75	147	432	350	243
day 6	147	50	122.5	423.5	31.25		283.5	275	243	250	68.75		208.25	176	250	484	242	425
day 8	243	152	222.75	400	159.25		243	243	243	110.25	75		375	192	263.25	183.75	283.5	300
day 10	171.5	83	160	350	99		250	171.5	183.75	325	126		232	183.75	159.25	183.75	224	222.75
day 12	208	171.5	332.75	504	208		183.75	363	303.75	222.75	108		147	126	106.25	147	208.25	117
day 14	208	208	591.5	633.75	224		183.75	363	283.5	176	208.25		108	117	100	222.75	240	171.5
day 16	350	375	484	882	283.5		256	263.25	363	134.75	425		325	117	159.25	432	504	222.75
day 18	375	484	1012.5	1012.5	350		303.75	300	159.25	98	229.5		147	117	252.5	423.5	504	243
day 20	648	612	1125	1012.5	425		97	283.5	110.25	50	134.75		122.5	147	144	363	504	202.5
day 24	676	648	1125	1068.75	425		114	171.5	110.25	43.75	61.5		240	98	128	363	591.5	350
day 26	1300.5	845	1445	1589.5	475		29	400	72	37.5	85.75		176	222.75	144	363	735	350
day 28	1805	1293.75	1782		756		37.5	400	110.25	37.5	110.25		243	325	182.25	363	1088	400
day 30	1895.25	1293.75	1782		1029		37.5	400	90	37.5	144		243	300	182.25	468	1012.5	400
day 32		1806.25			1589.5		54	720	176	63	144		234	300	250	1458	1985.5	400
Fig6. D
	PBS						JTC801 20mg/kg
day 0	18100000	74300000	33900000	3440000	37400000		39300000	74000000	30500000	21600000	13100000
day 8	287000000	321000000	1060000000	18900000	423000000		1730000	508000	23200000	1340000	22000000
Fig6. G
	PBS							JTC801 10mg/kg
day 0	73100000	72000000	187000000	29600000	119000000	222000000		70700000	20500000	171000000	53300000	138000000
day 7	397000000	243000000	650000000	36400000	137000000	98300000		260000000	4010000	375000000	336000000	103000000
day 14		1750000000	1170000000	787000000	1220000000	1790000000		208000000	177000000	352000000	10000000	548000000
day 21			869000000	1100000000	651000000	1980000000		361000000	122000000	607000000	723000000
Fig. S5C
Days	PBS						JTC801 10mg/kg
0	22	91.125	33.7	72	153		56	44	52	55.6875	56
3	8.25	8.5	81.25	216	153		112.5	22.5	68.75	44	70.875
5	100	73.7	309.375	567	352		198	10	70.875	87.5	200.688
7	102.6	94	654.312	480	567		318.5	9	93.75	144	445.5
10	211.738	400	373.75	875	892.688		204.188	8	137.5	153	295.312
12	418.663	505.75	567	1149.5	771.75		379.688	6	173.938	220.5	486
14	497	654.312	775	1523.44	1260		343	18	330.75	397.375	716.625
