# Supplementary material for: JTC801 regresses uveal melanoma progression through novel methuosis-like cell death via lysosomal dysfunction
Source: Research Square preprint supplement (doi:10.21203/rs.3.rs-5718647/v1), 2025-02-04

**Supporting Information**

**Original full length western blots**

1. The Original full length western blots used in Figure 4 (Fig. 4).


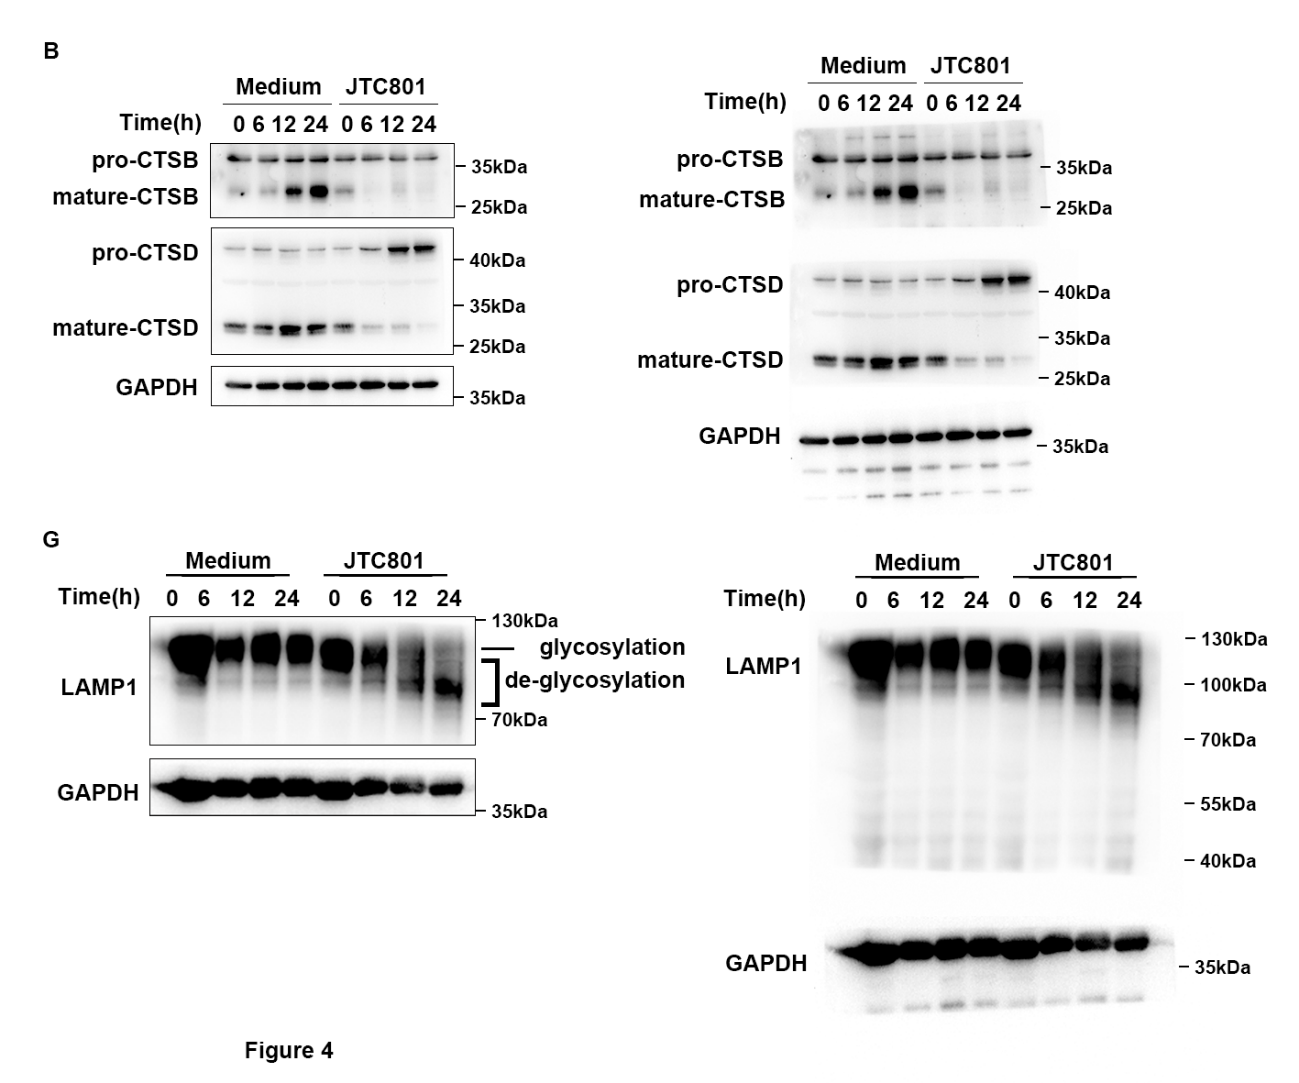


1. The Original full length western blots used in Figure 5 (Fig. 5).


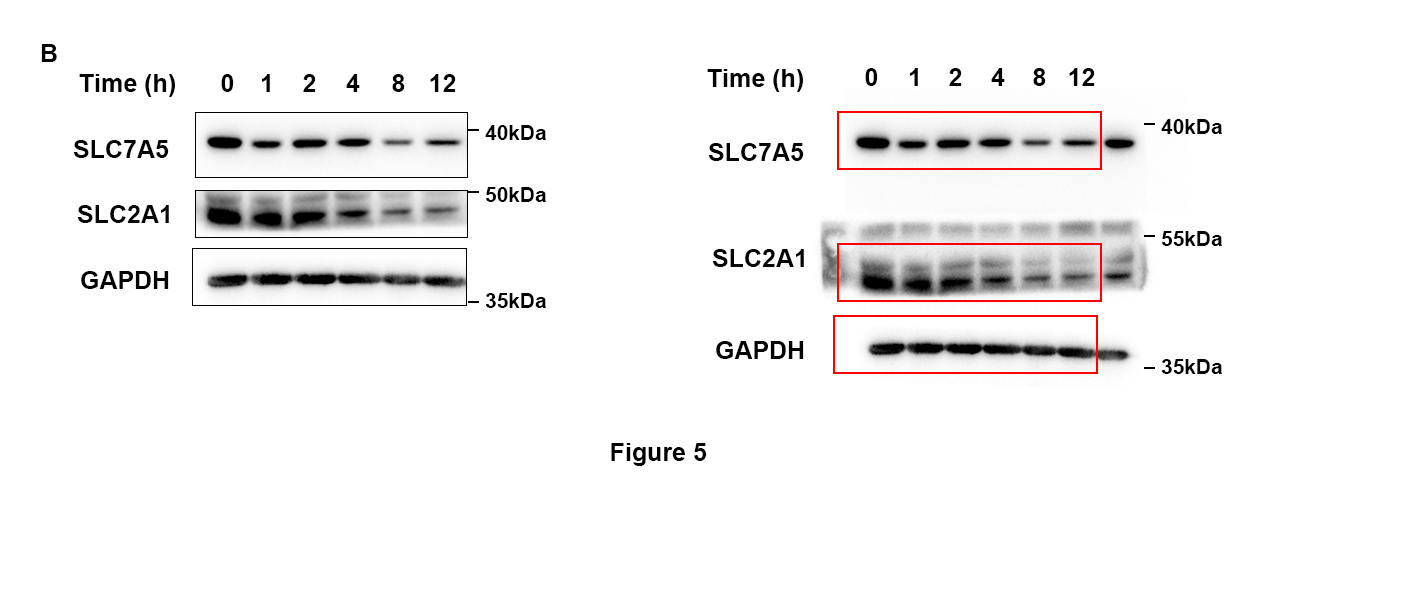


1. The Original full length western blots used in supplementary Figure 2 (Fig. S2).


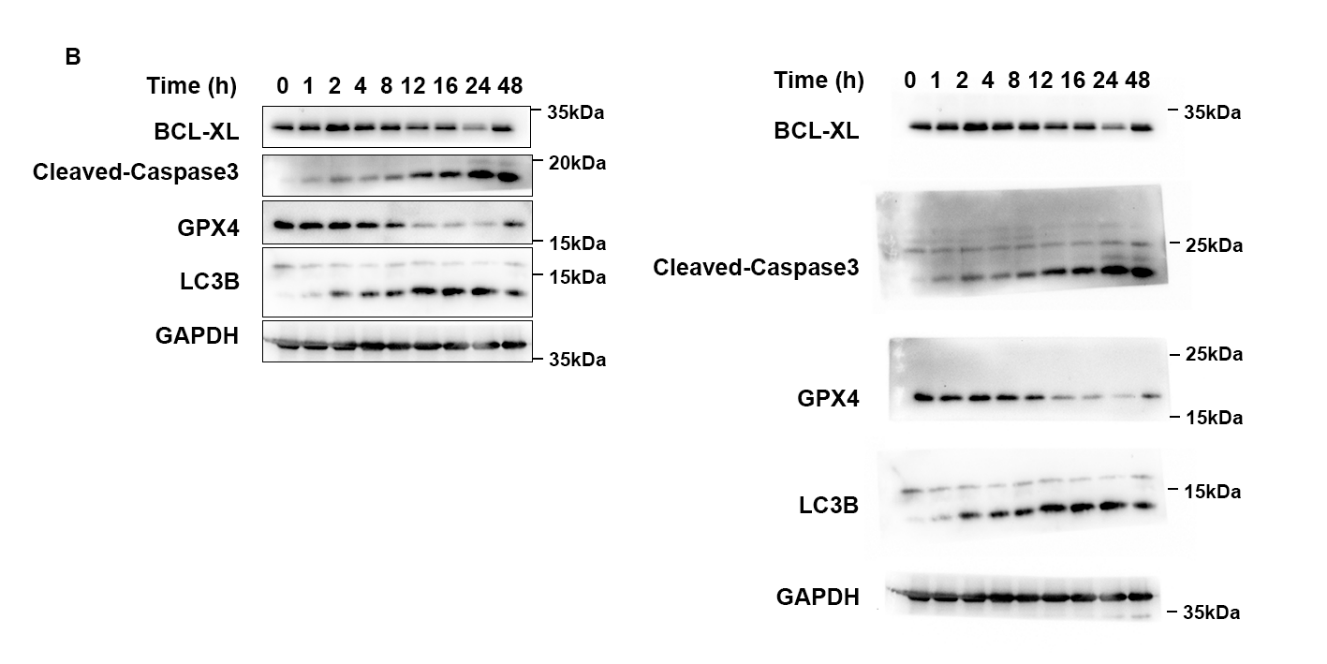

Supplement: Supplementary file 3 [file 56fcc12291f397dfbc7ed6e0.docx]
